# Supplementary material for: Peptide pACC1-nano complex suppresses ACC1-mediated lipogenesis 5 in breast cancer cells via altering p53/NF-κB pathway of signalling
Source: Research Square preprint supplement (doi:10.21203/rs.3.rs-6273696/v1), 2025-03-31

**Figure legends**

***Fig.1*** Dose dependent effect of PCN-J04 and TOFA induced cell viability after 24 h. **A)** MCF-7 cells treated with different concentrations of PCN-J04 (6, 12, 25, 50 and 100 µg/ml of final volume of peptide pACC1 containing PCN-J04).**B)** MCF-7 Cells treated with different concentration of TOFA (6, 12, 25, 50 and 100µg/ml. **C)** Dose dependent effects of PCN-J04 and TOFA. Values are presented as mean ±SE of three experiments in each group.

***Fig.2*** Effect of PCN-J04 on intracellular ROS formation as stained by DCFH-DA Photomicrograph showing the oxidative stress effect of upon treatment of PCN-J04 and TOFA.A) Control B) PCN-J04 C) TOFA and D) fluorescent intensity of  treated cells showing significant increase in the levels of ROS as compared to control. Values are presented as mean±SE of three experiments in each group ** P&lt; 0.05 vs control.

***Fig.3*** Apoptotic effect of PCN-J04. **A)** Photomicrograph showing the effect of PCN-J04 (2.89 µg/ml) and TOFA (4.78 µg/ml) induced apoptotic morphological changes in MCF-7 cells. **B)** DNA fragmentation of PCN-J04 and TOFA exposed MCF-7 cells for 3, 6 and 12 h. **C)** Flowcytometric analyses of MCF-7 cells treated with IC50 concentrations of PCN-J04 and TOFA at 3, 6 and 12 h cultures.

***Fig.4*** Immunoblot analysis of apoptotic marker proteins. Values are presented as mean ±SE of three experiments in each group, aP<0.05 vs control, nnon-significant vs control.

***Fig.5*** Immunoblotting of inflammatory marker proteins. Values are presented as mean ±SE of three experiments in each group, aP<0.05 vs control, nnon-significant vs control.

***Fig*.6** Inhibition of fatty acid synthesis by PCN-J04.Immunoblot expression of ACC1 and FASN. Values are presented as mean ±SE of three experiments in each group** P<0.05 vs control.

***Fig.7*** RT-PCR analysis of ACC1 and FASN genes. A) Agarose gel electrophoresis of RT-PCR for ACC1 and FASN genes expression .B) Densitometry values of RT-PCR, nsnon –significant vs control, #P< 0.05 vs control.

**Figure- 1**


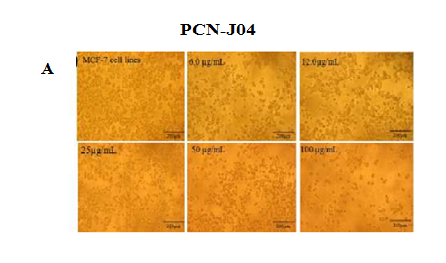


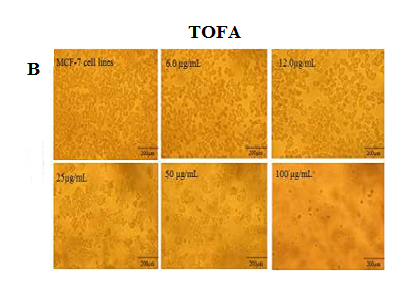


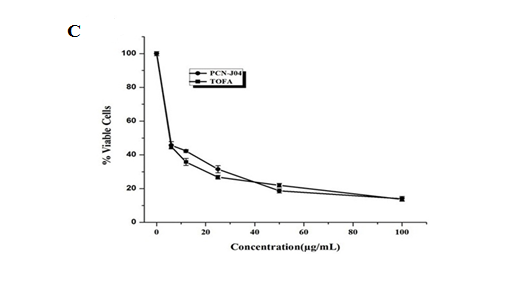


**Figure-2**


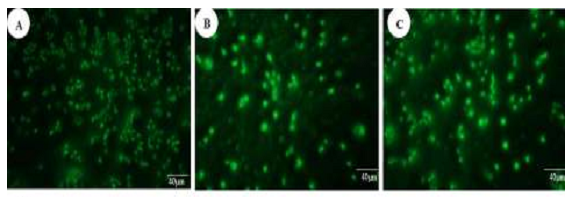


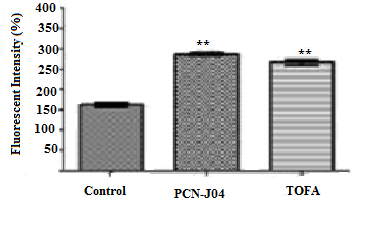


**Figure-3**

**
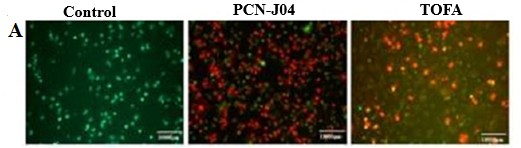
**


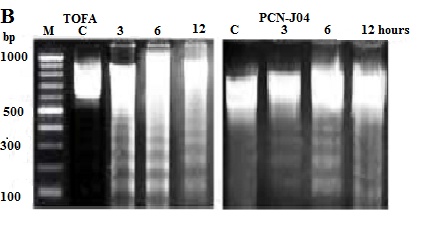


**
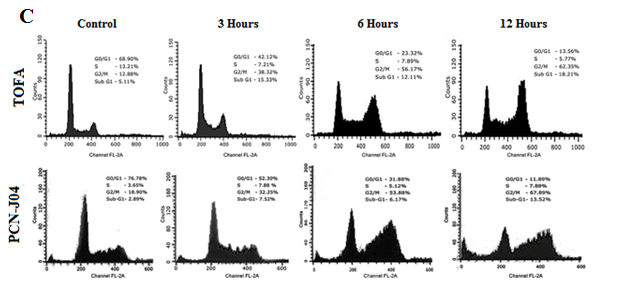
**

**Figure-4**

**
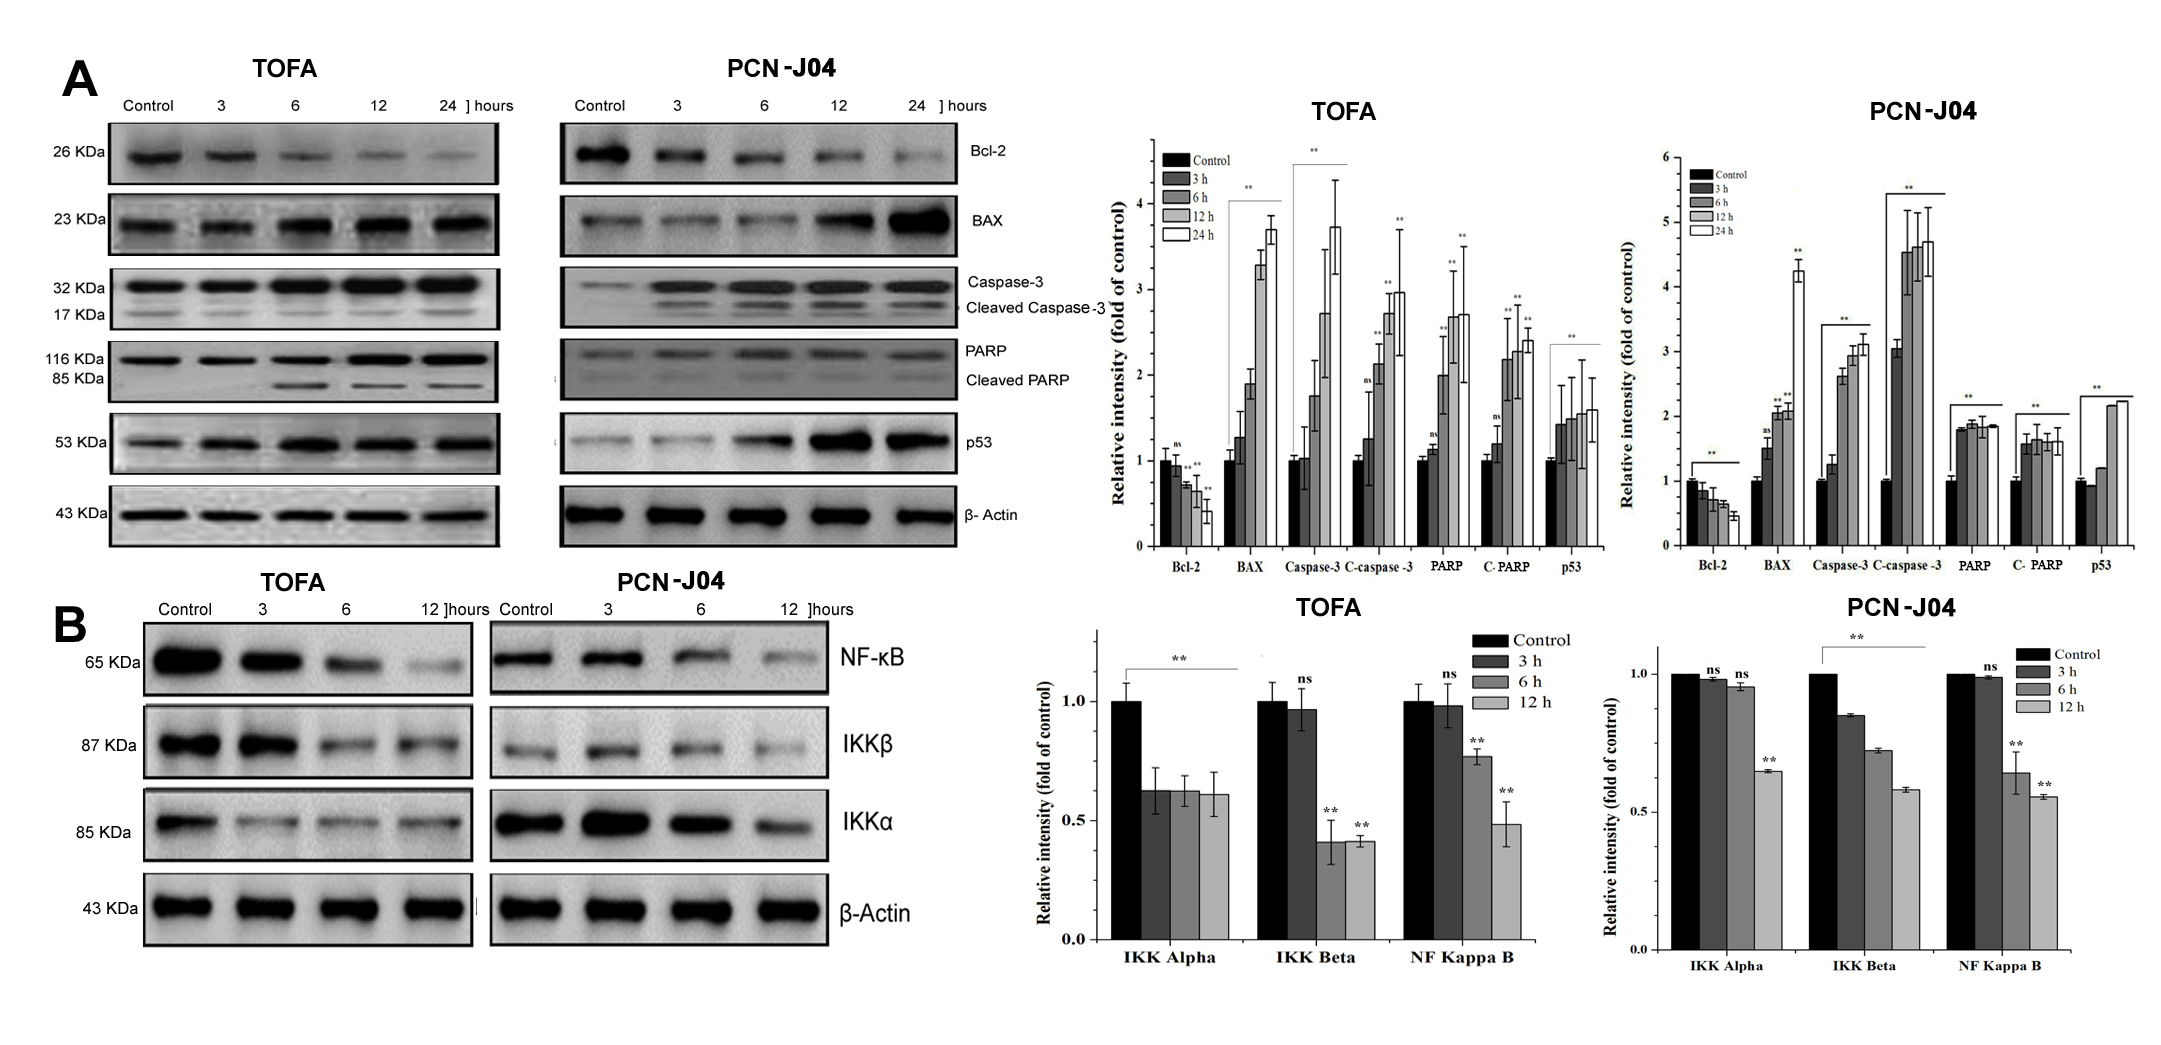
**

**Figure-5**


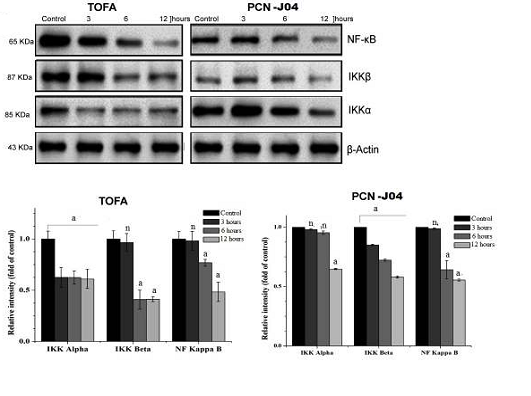


**Figure-6**


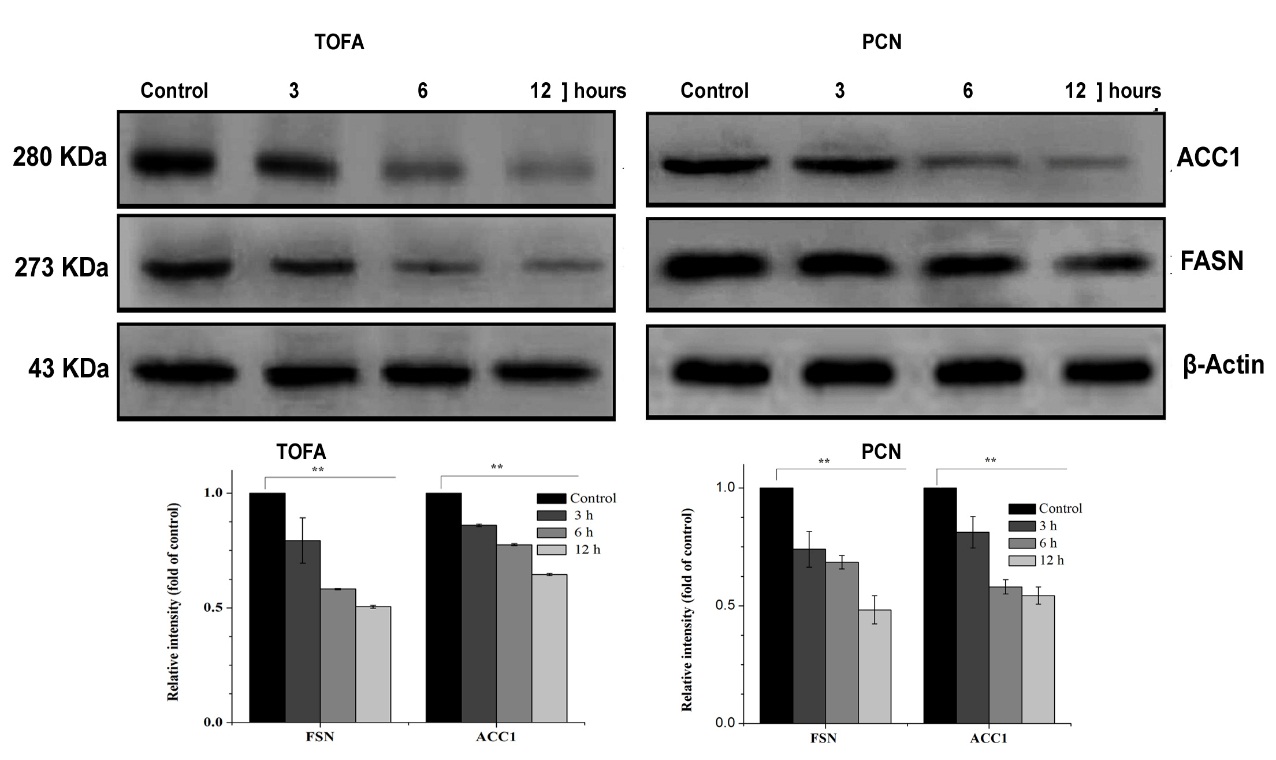


**Figure-7**


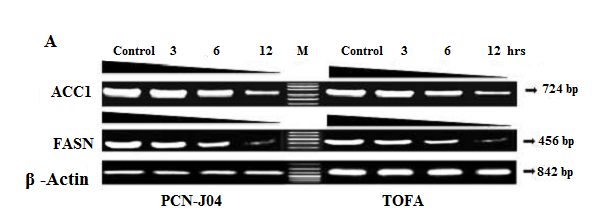


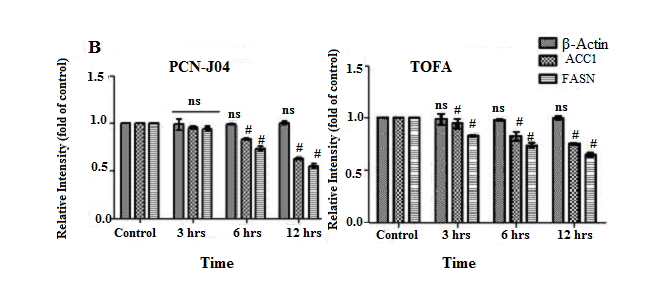

Supplement: Supplementary file 1 [file ddcf75c5a82bec3ca0ed5974.docx]
